# Supplementary material
Source: Research Square preprint supplement (doi:10.21203/rs.3.rs-8723644/v1)
Supplement: Supplementary file 1 [file 47099a89439a52124f2ec06e.pdf]

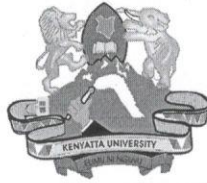

**KENYATTA UNIVERSITY  
CENTRE FOR RESEARCH ETHICS AND SAFETY**

**Fax: 8711242/8711575**  
**Email: [chairman.kuerc@ku.ac.ke](mailto:chairman.kuerc@ku.ac.ke)**  
**Nairobi, 00100**

**P. O. Box 43844,**

**Tel: 8710901/12**

**Website: [www.ku.ac.ke](http://www.ku.ac.ke)**  
**Our Ref: KU/ERC/APPROVAL/VOL.1**

**Date: 3<sup>rd</sup> /04/2023**

---

Dr. Grace Githemo  
P.O Box 43844, 00100  
Nairobi.

Dear Dr. Githemo,

**APPLICATION NUMBER: PKU/2563/I689 - EVALUATION OF THE EFFECT OF TRAINING AND IMPLEMENTATION OF THE PORTABLE ULTRASOUND DEVICES AMONG MID-LEVEL CLINICIANS ON MATERNAL AND NEONATAL HEALTH SERVICES IN SELECTED COUNTIES IN KENYA**

---

This is to inform you that **KENYATTA UNIVERSITY ETHICS REVIEW COMMITTEE** has reviewed and approved your above research proposal. Your application approval number is **PKU/2563/I689**. The approval period is **3<sup>rd</sup> /04/2023 to 3<sup>rd</sup> /04/2024**

This approval is subject to compliance with the following requirements;

- i. Only approved documents including (informed consents, study instruments, MTA) will be used
- ii. All changes including (amendments, deviations, and violations) are submitted for review and approval by **KENYATTA UNIVERSITY ETHICS REVIEW COMMITTEE**
- iii. Death and life threatening problems and serious adverse events or unexpected adverse events whether related or unrelated to the study must be reported to **KENYATTA UNIVERSITY ETHICS REVIEW COMMITTEE** within 72 hours of notification
- iv. Any changes, anticipated or otherwise that may increase the risks or affected safety or welfare of study participants and others or affect the integrity of the research must be reported to **KENYATTA UNIVERSITY ETHICS REVIEW COMMITTEE** within 72 hours

- v. Clearance for export of biological specimens must be obtained from relevant institutions.
- vi. Submission of a request for renewal of approval at least 60 days prior to expiry of the approval period. Attach a comprehensive progress report to support the renewal.
- vii. Submission of an executive summary report within 90 days upon completion of the study to **KENYATTA UNIVERSITY ETHICS REVIEW COMMITTEE**

Prior to commencing your study, you will be expected to obtain a research license from National Commission for Science, Technology and Innovation (NACOSTI) <https://research-portal.nacosti.go.ke> and also obtain other clearances needed.

To serve you better, researchers are kindly requested to access and complete a customer feedback form and sent it back online as you continue with research and upon completion of data collection found on the following website link;  
;[https://docs.google.com/forms/d/1ytWefDwvyz5h1oz\\_VIn0xbxg3uGdlDzMXFWNDsMrRPQ/edit?usp=sharing](https://docs.google.com/forms/d/1ytWefDwvyz5h1oz_VIn0xbxg3uGdlDzMXFWNDsMrRPQ/edit?usp=sharing)

Yours sincerely

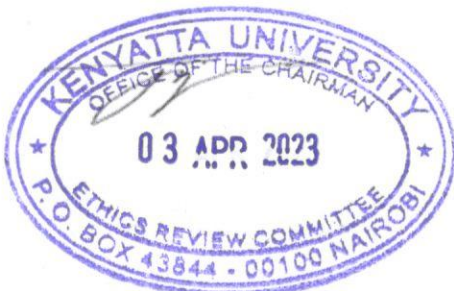

**Prof. Judith Kimiywe**

**Director: Centre for Research Ethics and Safety**
