# Supplementary material
Source: Research Square preprint supplement (doi:10.21203/rs.3.rs-8723644/v1)
Supplement: Supplementary file 2 [file 5c9a13b4fa37998b784dea3f.pdf]

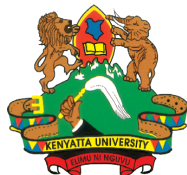

# KU POCUS PROJECT POCUS REFERRAL TRACER FORM

Facility name \_\_\_\_\_  
County \_\_\_\_\_

This form should be completed in duplicate and a copy retained in the POCUS book and the other pinned to the patient's booklet for all patients who are referred after POCUS.

**ALL PATIENTS REFERRED AFTER POCUS SHOULD BE REQUESTED TO BRING FEEDBACK IN FORM OF COMPREHENSIVE SCAN REPORT OR DISCHARGE SUMMARY DURING NEXT ANC OR PNC ATTENDANCE**

Date \_\_\_\_\_  
Patient name: \_\_\_\_\_ Age: \_\_\_\_\_ Tel: \_\_\_\_\_  
LMP- \_\_\_\_\_ EDD \_\_\_\_\_  
Calculated gestation age in weeks \_\_\_\_\_  
Next of kin name \_\_\_\_\_ Tel \_\_\_\_\_  
Referred to \_\_\_\_\_

### 1. Your POCUS finding

- |                                            |                                                    |                                            |
|--------------------------------------------|----------------------------------------------------|--------------------------------------------|
| <input type="checkbox"/> Presentation      | <input type="checkbox"/> Cephalic                  | <input type="checkbox"/> Non-cephalic      |
| <input type="checkbox"/> Fetal heart beats | <input type="checkbox"/> Present                   | <input type="checkbox"/> Absent            |
| <input type="checkbox"/> Fetal heart rate  | <input type="checkbox"/> Normal (110 - 160bpm)     | <input type="checkbox"/> Abnormal          |
| <input type="checkbox"/> Number of fetuses | <input type="checkbox"/> Single                    | <input type="checkbox"/> Multiple          |
| <input type="checkbox"/> Liquor amount     | <input type="checkbox"/> (normal ( <2 cm, >8 cm) - | <input type="checkbox"/> Abnormal          |
| <input type="checkbox"/> Placenta          | <input type="checkbox"/> Normally placed           | <input type="checkbox"/> Abnormally placed |

### 2. Reason for referral/referral location

- Comprehensive US (at same facility)
- Comprehensive US (at other facility- specify which one )
- Other facility for specialist/high risk ANC follow-up specify which facility
- Other facility for delivery specify which facility
- Others reasons for referral (specify reason and to which facility)

\_\_\_\_\_  
\_\_\_\_\_  
\_\_\_\_\_

Brief summary of feedback from facility referred from the comprehensive scan report or discharge summary

\_\_\_\_\_  
\_\_\_\_\_  
\_\_\_\_\_

Provider referring \_\_\_\_\_

Signature \_\_\_\_\_
